# Supplementary material for: Independent replication of polymorphisms predicting toxicity in breast cancer patients randomized between dose-dense and docetaxel-containing adjuvant chemotherapy
Source: PubMed Central journal article supplement (PMC5768344; doi:10.18632/oncotarget.22697), 2017-11-27
Supplement: oncotarget-08-113531-s001.pdf [file oncotarget-08-113531-s001.pdf]

## Independent replication of polymorphisms predicting toxicity in breast cancer patients randomized between dose-dense and docetaxel-containing adjuvant chemotherapy

### SUPPLEMENTARY MATERIALS

**Supplementary Table 1: Number of treatment cycles, dose reductions of at least 10%, dose delays and discontinuation of therapy due to toxicity per treatment arm**

|                | dose dense AC |                            |                                          |                        | TAC           |                            |                                          |                        |
|----------------|---------------|----------------------------|------------------------------------------|------------------------|---------------|----------------------------|------------------------------------------|------------------------|
|                | No. of cycles | No. of dose reductions (%) | Stop due to toxicity after cycle no. (%) | Delays due to toxicity | No. of cycles | No. of dose reductions (%) | Stop due to toxicity after cycle no. (%) | Delays due to toxicity |
| <b>Cycle 1</b> | 327           | 0                          | 0                                        | 0                      | 319           | 0                          | 5 (1.6)                                  | 0                      |
| <b>Cycle 2</b> | 326           | 1 (0.3)                    | 0                                        | 9 (2.8)                | 310           | 9 (2.9)                    | 4 (1.3)                                  | 7 (2.3)                |
| <b>Cycle 3</b> | 326           | 4 (1.2)                    | 4 (1.2)                                  | 13 (4.0)               | 306           | 2 (0.7)                    | 4 (1.3)                                  | 10 (3.3)               |
| <b>Cycle 4</b> | 321           | 4 (1.2)                    | 4 (1.2)                                  | 12 (3.7)               | 302           | 8 (2.6)                    | 5 (1.7)                                  | 6 (2.0)                |
| <b>Cycle 5</b> | 317           | 1 (0.3)                    | 14 (4.4)                                 | 19 (6.0)               | 295           | 8 (2.7)                    | 8 (2.7)                                  | 16 (5.4)               |
| <b>Cycle 6</b> | 297           | 3 (1.0)                    | 0                                        | 22 (7.4)               | 285           | 12 (4.2)                   | 0                                        | 5 (1.8)                |
| <b>Total</b>   | 1914          | 13 (0.7)                   | 22 (6.7)                                 | 75 (3.9)               | 1817          | 39 (2.1)                   | 26 (8.2)                                 | 44 (2.4)               |

A = doxorubicin; C = cyclophosphamide; T=docetaxel

**Supplementary Table 2: Number of adverse events (grade 2 or higher) for each CTCAE category**

|                                    | dose dense AC<br><i>n</i> = 327 | TAC<br><i>n</i> = 319 | Total<br><i>n</i> = 646 | <i>p</i> -value*   |
|------------------------------------|---------------------------------|-----------------------|-------------------------|--------------------|
| <b>Allergy/Immunology</b>          | 2                               | 7                     | 9                       | 0.103 <sup>†</sup> |
| <b>Blood/Bone marrow</b>           | 78                              | 41                    | 119                     | < 0.001            |
| Anemia                             | 62 (18.9)                       | 15 (4.7)              | 77 (11.9)               | < 0.001            |
| Leukocytopenia                     | 30 (9.2)                        | 20 (6.3)              | 50 (7.7)                | 0.167              |
| Neutropenia                        | 9 (2.8)                         | 8 (2.5)               | 17 (2.6)                | 0.846              |
| Thrombopenia                       | 7 (2.1)                         | 3 (0.9)               | 10 (1.5)                | 0.340 <sup>†</sup> |
| <b>Cardiac Arrhythmia</b>          | 7                               | 3                     | 10                      | 0.340 <sup>†</sup> |
| <b>Cardiac general</b>             | 0                               | 4 (1.3)               | 4 (0.6)                 | 0.059 <sup>†</sup> |
| <b>Constitutional symptoms</b>     | 130                             | 118                   | 248                     | 0.470              |
| Fatigue                            | 117 (35.8)                      | 109 (34.2)            | 226 (35.0)              | 0.668              |
| Fever (without neutropenia)        | 14 (4.3)                        | 10 (3.1)              | 24 (3.7)                | 0.441              |
| <b>Dermatology/Skin</b>            | 118                             | 106                   | 224                     | 0.446              |
| <b>Endocrine</b>                   | 4                               | 9                     | 13                      | 0.170 <sup>†</sup> |
| <b>Gastrointestinal</b>            | 125                             | 133                   | 258                     | 0.368              |
| Anorexia                           | 19 (5.8)                        | 9 (2.8)               | 28 (4.3)                | 0.062              |
| Constipation                       | 16 (5.0)                        | 25 (7.8)              | 41 (6.3)                | 0.125              |
| Diarrhea                           | 21 (6.4)                        | 53 (16.6)             | 74 (11.5)               | < 0.001            |
| Mucositis                          | 15 (4.6)                        | 11 (3.4)              | 26 (4.0)                | 0.462              |
| Nausea                             | 65 (20.0)                       | 52 (16.3)             | 117 (18.1)              | 0.238              |
| Vomiting                           | 35 (10.7)                       | 21 (6.6)              | 56 (8.7)                | 0.063              |
| <b>Hemorrhage/Bleeding</b>         | 1                               | 0                     | 1                       | 1.000 <sup>†</sup> |
| <b>Hepatobiliary/Pancreas</b>      | 1                               | 0                     | 1                       | 1.000 <sup>†</sup> |
| <b>Infection</b>                   | 94                              | 94                    | 188                     | 0.840              |
| Febrile neutropenia                | 36 (11.0)                       | 40 (12.5)             | 76 (11.8)               | 0.546              |
| <b>Edema limb</b>                  | 1                               | 17                    | 18                      | < 0.001            |
| <b>Metabolic/Laboratory</b>        | 11                              | 8                     | 19                      | 0.235              |
| <b>Musculoskeletal/Soft tissue</b> | 2                               | 2                     | 4                       | 1.000 <sup>†</sup> |
| <b>Neurology</b>                   | 32                              | 62                    | 94                      | 0.001              |
| Peripheral neuropathy              | 15 (4.6)                        | 46 (14.4)             | 61 (9.4)                | < 0.001            |
| <b>Ocular/Visual</b>               | 14                              | 11                    | 25                      | 0.583              |
| <b>Pain</b>                        | 42                              | 49                    | 91                      | 0.358              |
| Bone                               | 8 (2.4)                         | 13 (4.1)              | 21 (3.3)                | 0.243              |
| Head                               | 17 (5.2)                        | 8 (2.5)               | 25 (3.9)                | 0.076              |
| <b>Pulmonary/Upper respiratory</b> | 48                              | 28                    | 76                      | 0.020              |
| Cough                              | 19 (5.8)                        | 7 (2.2)               | 26 (4.0)                | 0.019              |
| Dyspnea                            | 19 (5.8)                        | 20 (6.3)              | 39 (6.0)                | 0.806              |
| <b>Renal/Genitourinary</b>         | 3                               | 0                     | 3                       | 0.249 <sup>†</sup> |
| <b>Sexual/Reproductive system</b>  | 3                               | 2                     | 5                       | 1.000 <sup>†</sup> |
| <b>Syndromes</b>                   | 3                               | 4                     | 7                       | 0.722 <sup>†</sup> |
| <b>Vascular</b>                    | 21                              | 10                    | 31                      | 0.051              |

For the CTCAE categories, the numbers reflect the number of patients that had at least one side effect in that CTCAE category. For the individual side effects (blanc rows), the observed toxicity is counted once per patient. \* Pearson's chi square test (2-sided); † Fisher's exact test was applied.

**Supplementary Table 3: Toxicities of special interest**

|                          | dose dense AC<br><i>n</i> = 327 | TAC<br><i>n</i> = 319 | Total<br><i>n</i> = 646 |
|--------------------------|---------------------------------|-----------------------|-------------------------|
| Acute myeloid leukemia   | 1                               | 1                     | 2                       |
| Myelodysplastic syndrome | 1                               |                       | 1                       |
| Heart failure grade 3-4  | 1                               | 2                     | 3                       |

**Supplementary Table 4: Distribution of genotypes and Hardy Weinberg Equilibrium test for selected genetic variants. \*Pearson chi-square test (2-sided), missing values excluded. See Supplementary\_Table\_4**

**Supplementary Table 5: Summary of the original association studies for anemia (A), febrile neutropenia (B) and peripheral neuropathy (C). See\_Supplementary\_Table 5**

**Supplementary Table 6: Validation of previously reported associations between anemia (A1), febrile neutropenia (B1) and peripheral neuropathy (C1) and SNPs using univariate binary logistic regression analyses. Multivariate binary logistic regression analyses (A2, C2) were made with only the significantly different factors. OR = odds ratio; CI = confidence interval. See Supplementary\_Table\_6**

**Supplementary Table 7: Risk of anemia (A), febrile neutropenia (B) and peripheral neuropathy (C) per treatment arm in previously reported clinical or genotype subgroups. OR = odds ratio; CI = confidence interval. See Supplementary\_Table\_7**

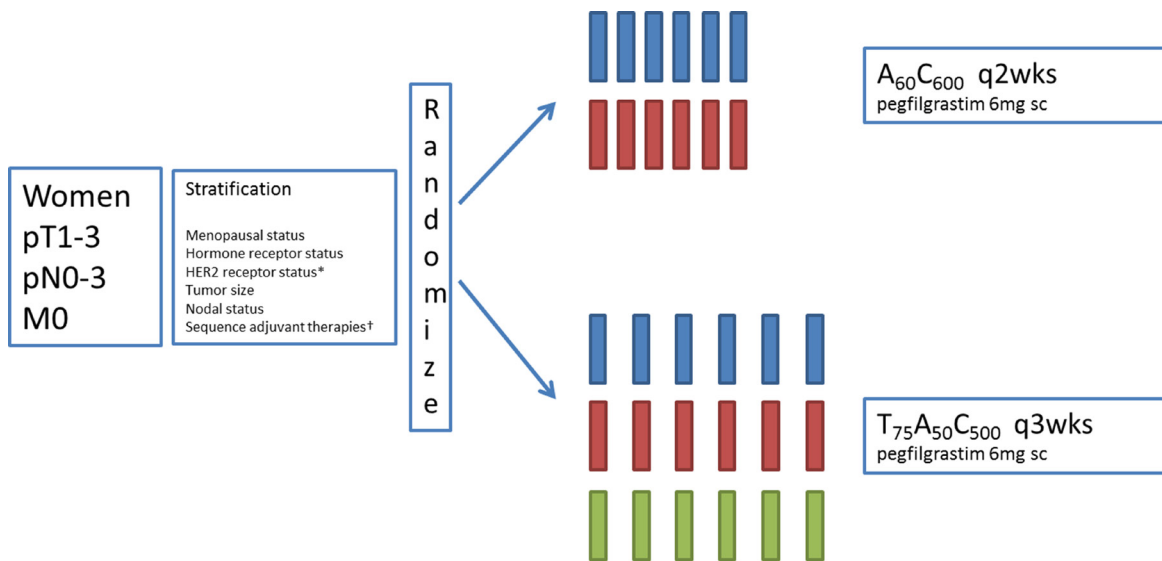

**Supplementary Figure 1: Design of the Matador study: a multicenter, randomized phase III trial.** \*The Matador study included patients from 2004 to 2012; HER2 positive patients were included in the Matador study until August 2007, afterwards they were excluded due to perceived superiority of concurrent administration of trastuzumab with chemotherapy. †The sequence of adjuvant radiotherapy followed by chemotherapy or vice versa. HER2 = human epidermal growth factor receptor 2; A = doxorubicin; C = cyclophosphamide; T = docetaxel; wks = weeks; mg = milligram.

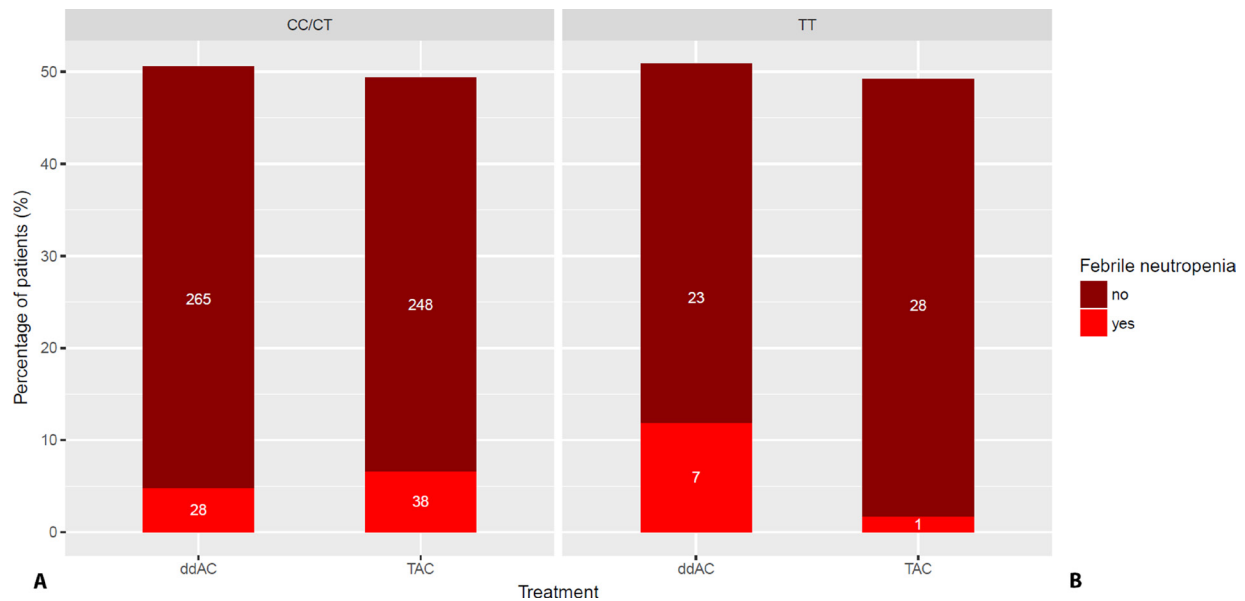

**Supplementary Figure 2:** Proportion of patients with febrile neutropenia per treatment arm in patients with a CC/CT genotype (A) or a TT genotype (B) for *FGFR4*. The numbers in the bars represent the number of patients.
